# Supplementary material
Source: PubMed Central journal article supplement (PMC3055197)

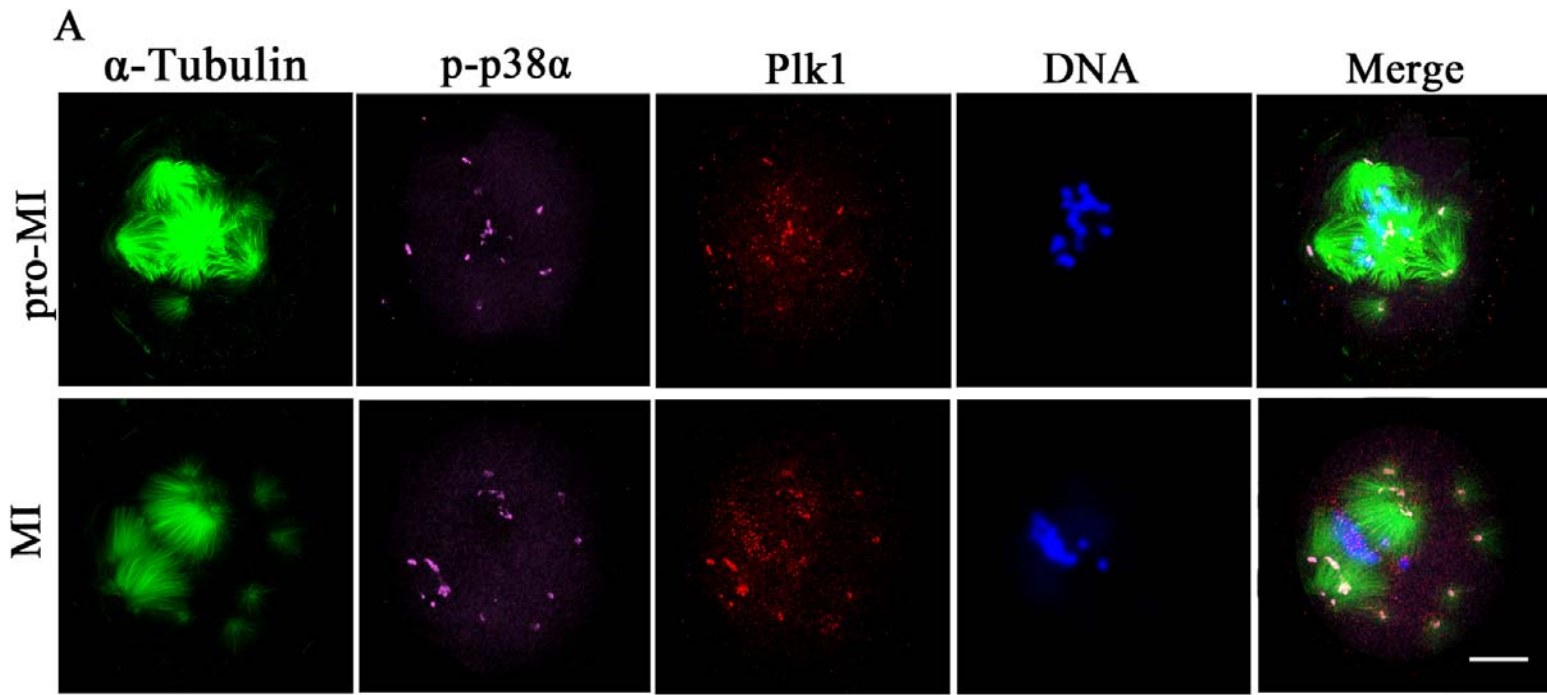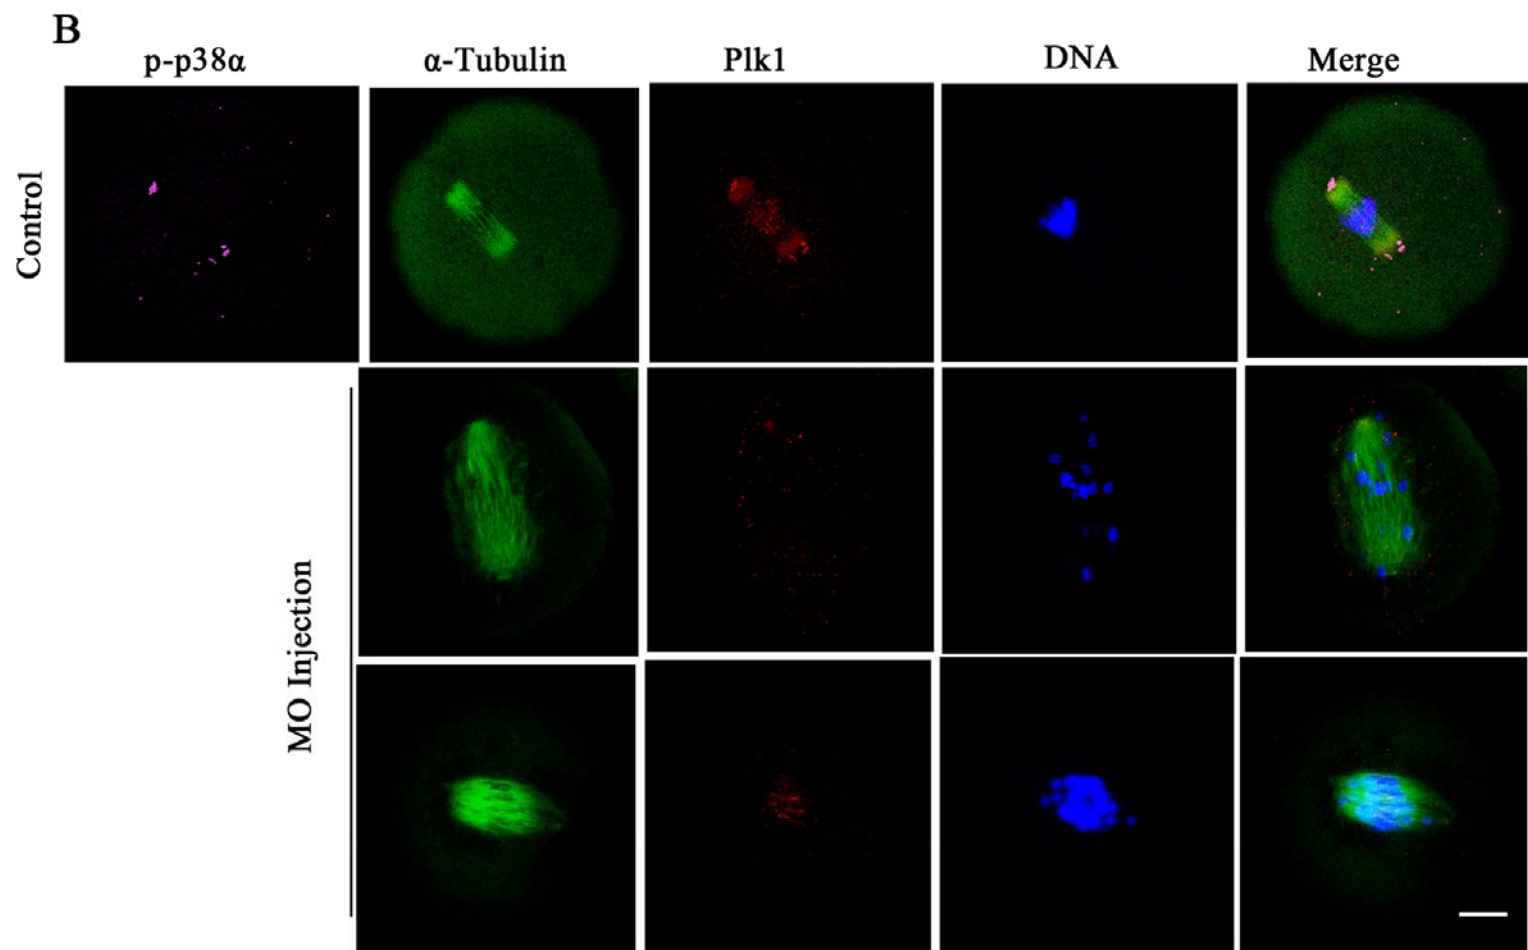

Supplement: cc0920_4130SD1.pdf [file cc0920_4130SD1.pdf]
